# Supplementary material for: Polyunsaturated fatty acids associated with delayed biological aging: NHANES 2005–2010
Source: Research Square preprint supplement (doi:10.21203/rs.3.rs-4091161/v1), 2024-03-18
Supplement: Supplementary file 1 [file 16a2f71e5389a029f5afc550.docx]

**sTable 1 Association between dietary PUFAs intake and PhenoAge using unweighted data**

| **Dietary PUFAs intake (g/d)** | **Model 1** | | **Model 2** | | **Model 3** | |
| --- | --- | --- | --- | --- | --- | --- |
| **β (95% CI)** | ***P*-Value** | **β (95% CI)** | ***P*-Value** | **β (95% CI)** | ***P*-Value** |
| Continuous (per SD) | -0.04 (-0.05,-0.02) | <0.0001 | -0.04(-0.05,-0.03) | <0.0001 | -0.02(-0.04,-0.01) | 0.006 |
| Q1 (≤9.20 ) | Ref | | Ref | | Ref | |
| Q2 (9.20-14.66) | -0.49(-0.90,-0.09) | 0.02 | -0.49(-0.89,-0.09) | 0.04 | -0.23(-0.61,0.15) | 0.23 |
| Q3 (14.66-22.04) | -0.97(-1.38,-0.56) | <0.0001 | -1.00(-1.40,-0.59) | <0.0001 | -0.41(-0.82,-0.01) | 0.04 |
| Q4 ( > 22.04) | -1.20(-1.61,-0.79) | <0.0001 | -1.22(-1.64,-0.81) | <0.0001 | -0.64(-1.13,-0.17) | 0.01 |
| *P* for trend |  | <0.0001 |  | <0.0001 |  | 0.006 |
